# Supplementary material for: Molecular and morphological evidence for a new species of Leptopus (Phyllanthaceae) from Southeast Yunnan, China
Source: PeerJ journal article supplement (doi:10.7717/peerj.11989), 2021-08-24

华南农业大学植物标本馆  
采集记录

项目  
采集号 YAN20071501 采集日期 2010年7月15日  
采集人 苏维纲  
采集地 云南省麻栗坡县老山转至哈阿近  
经纬度 海拔 约2000m  
生境 路边, 石坡, 林下

高(m) 性状

其他描述

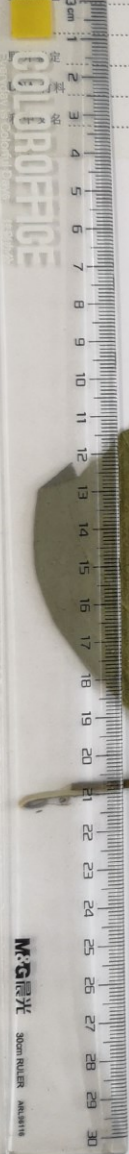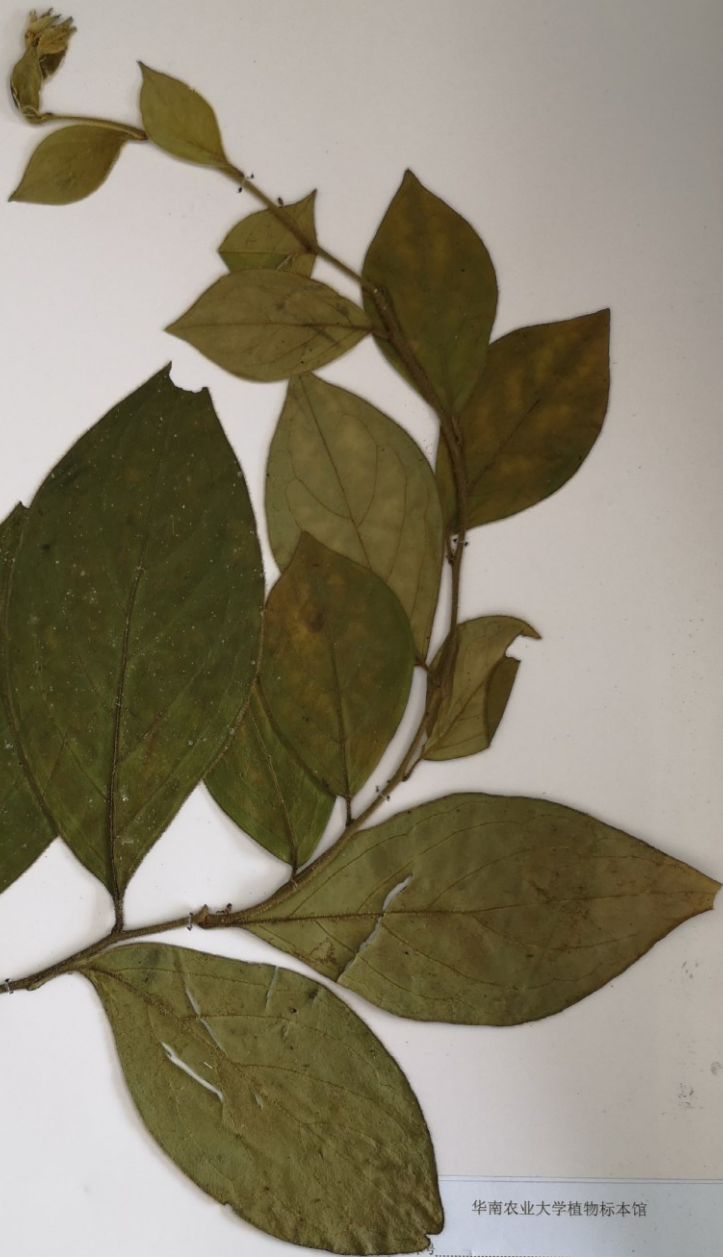

华南农业大学植物标本馆

中文名 麻栗坡雀舌木  
拉丁名 *Leptopus malipoensis* sp.  
装订人 采集人 苏维纲  
鉴定人 苏维纲 采集号 YAN20071501

OLOROFFICE  
day is Colorful Days  
22 23 24

3  
4  
5  
6  
7  
8  
9  
10  
11  
12  
13  
14  
15  
16  
17  
18  
19  
20  
21  
22  
23  
24  
25  
26  
27  
28  
29

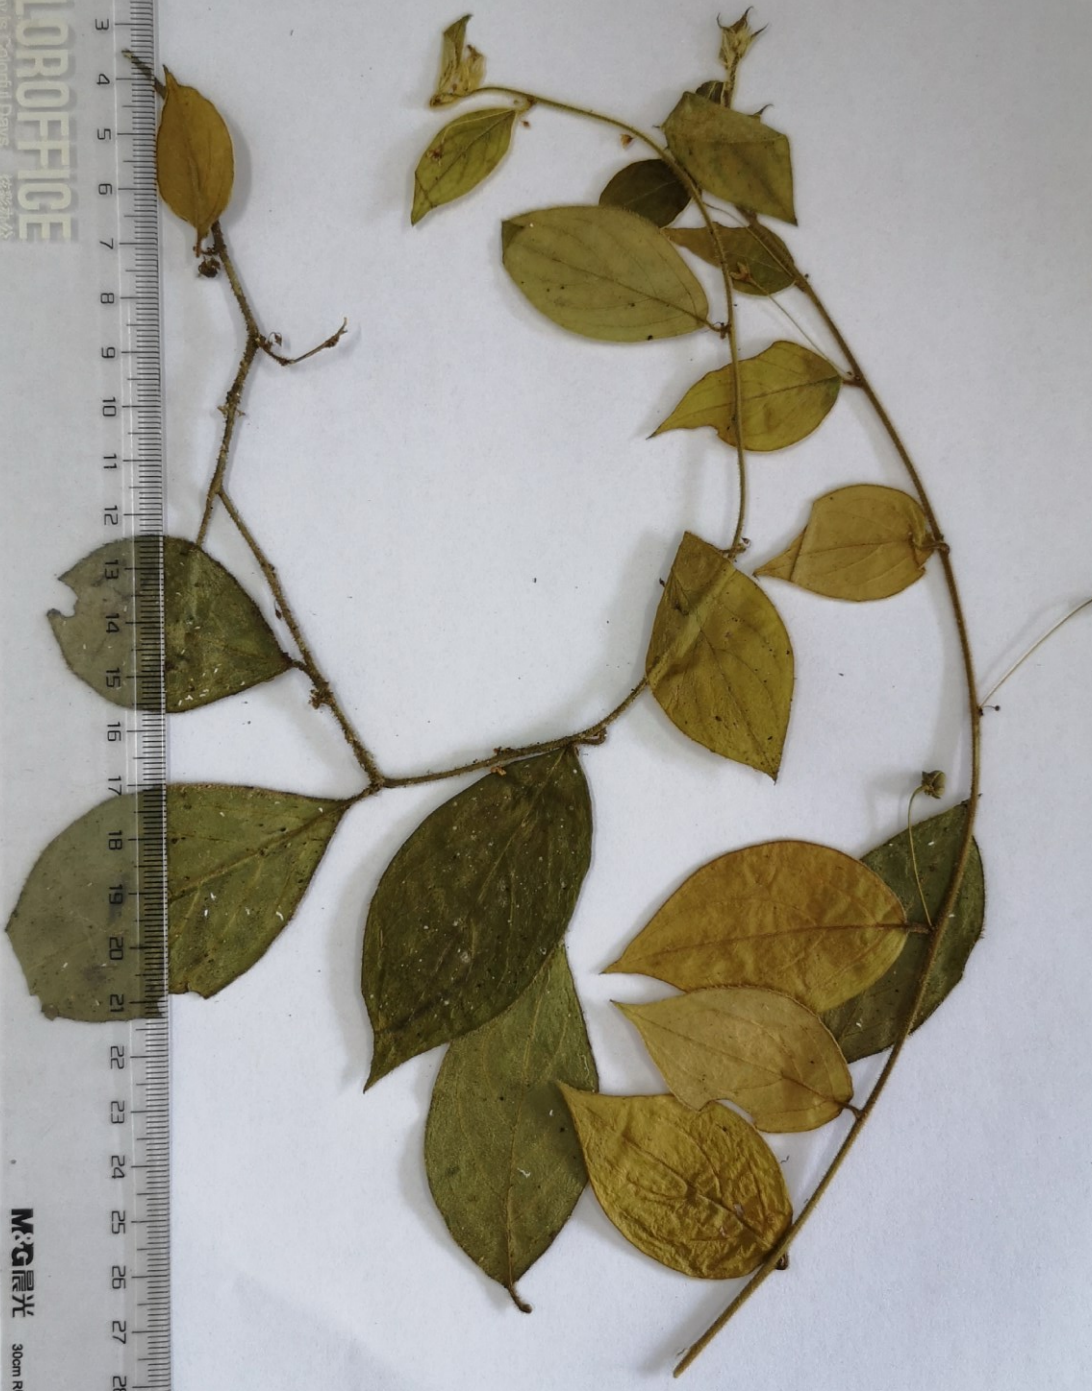

M:G晨光  
30cm RULER  
AR1381



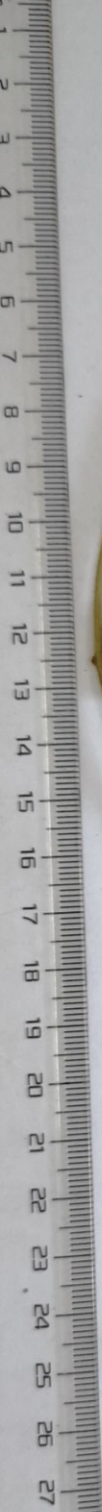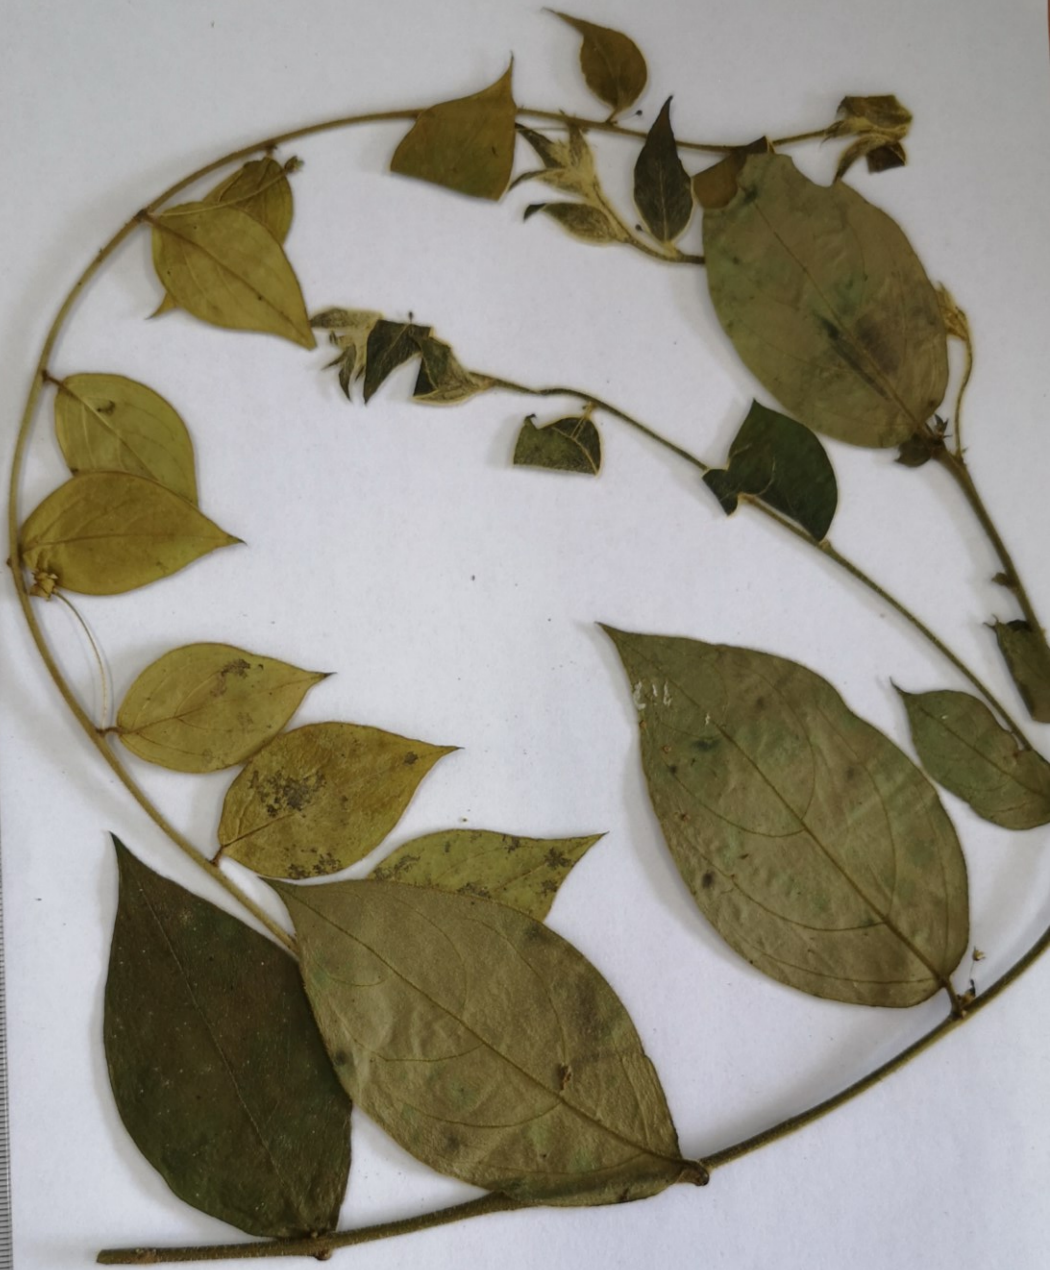

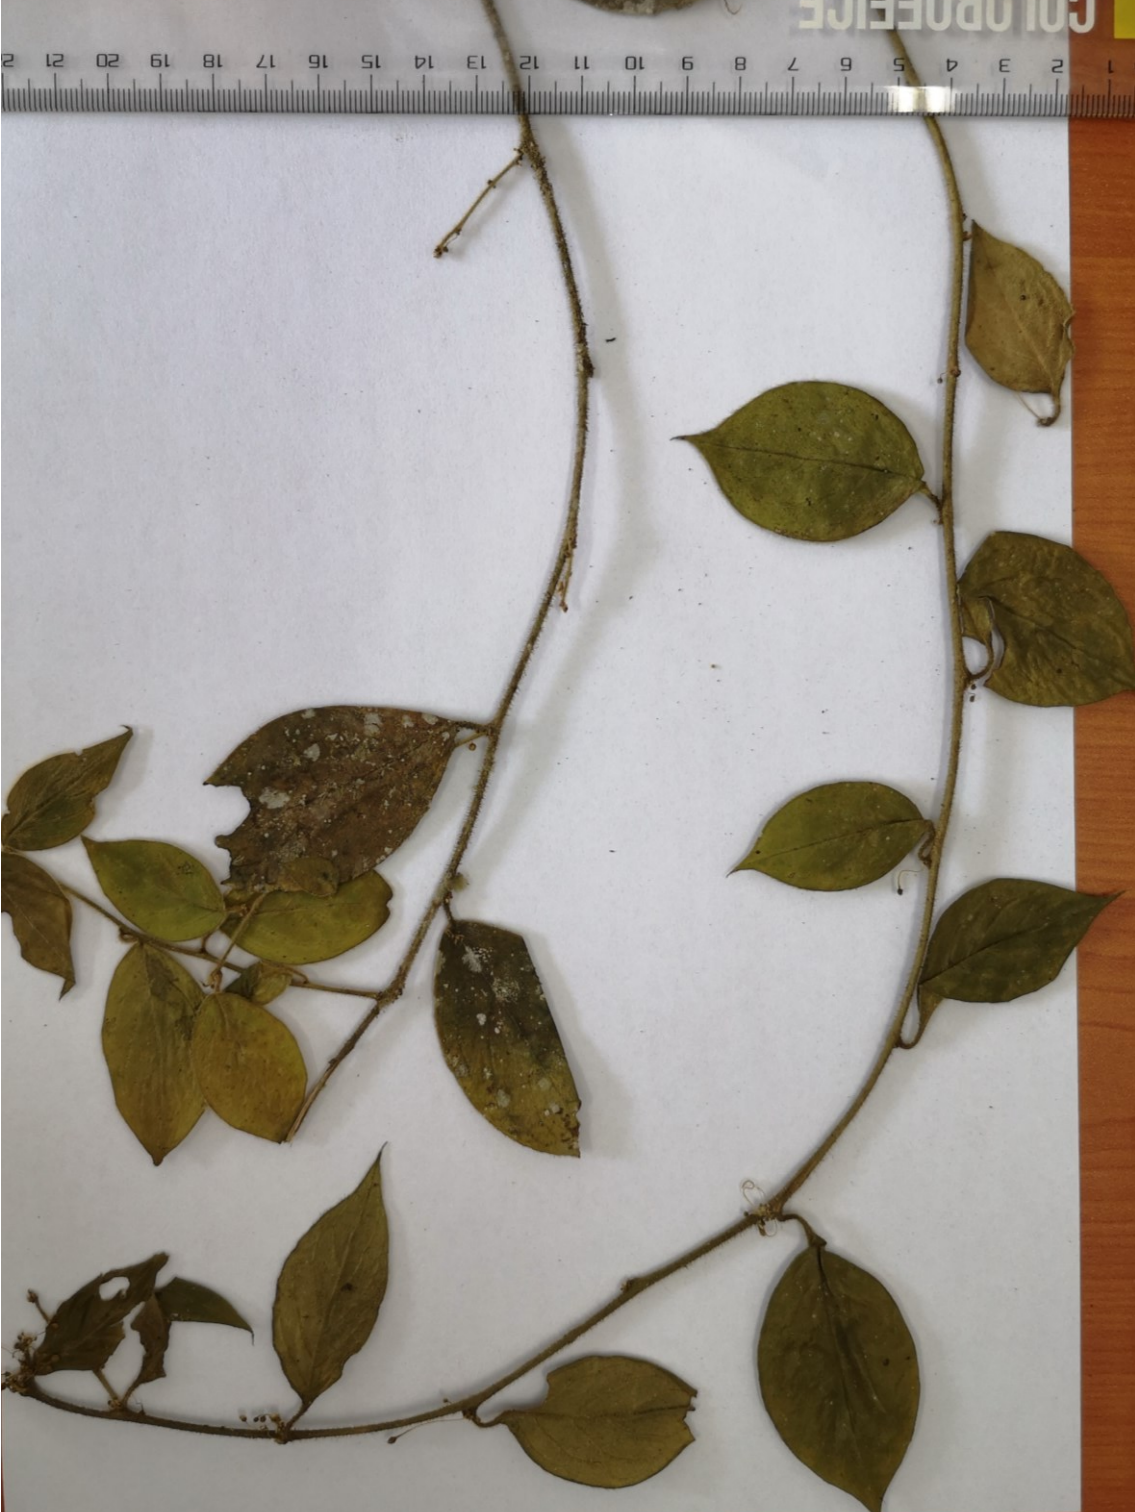



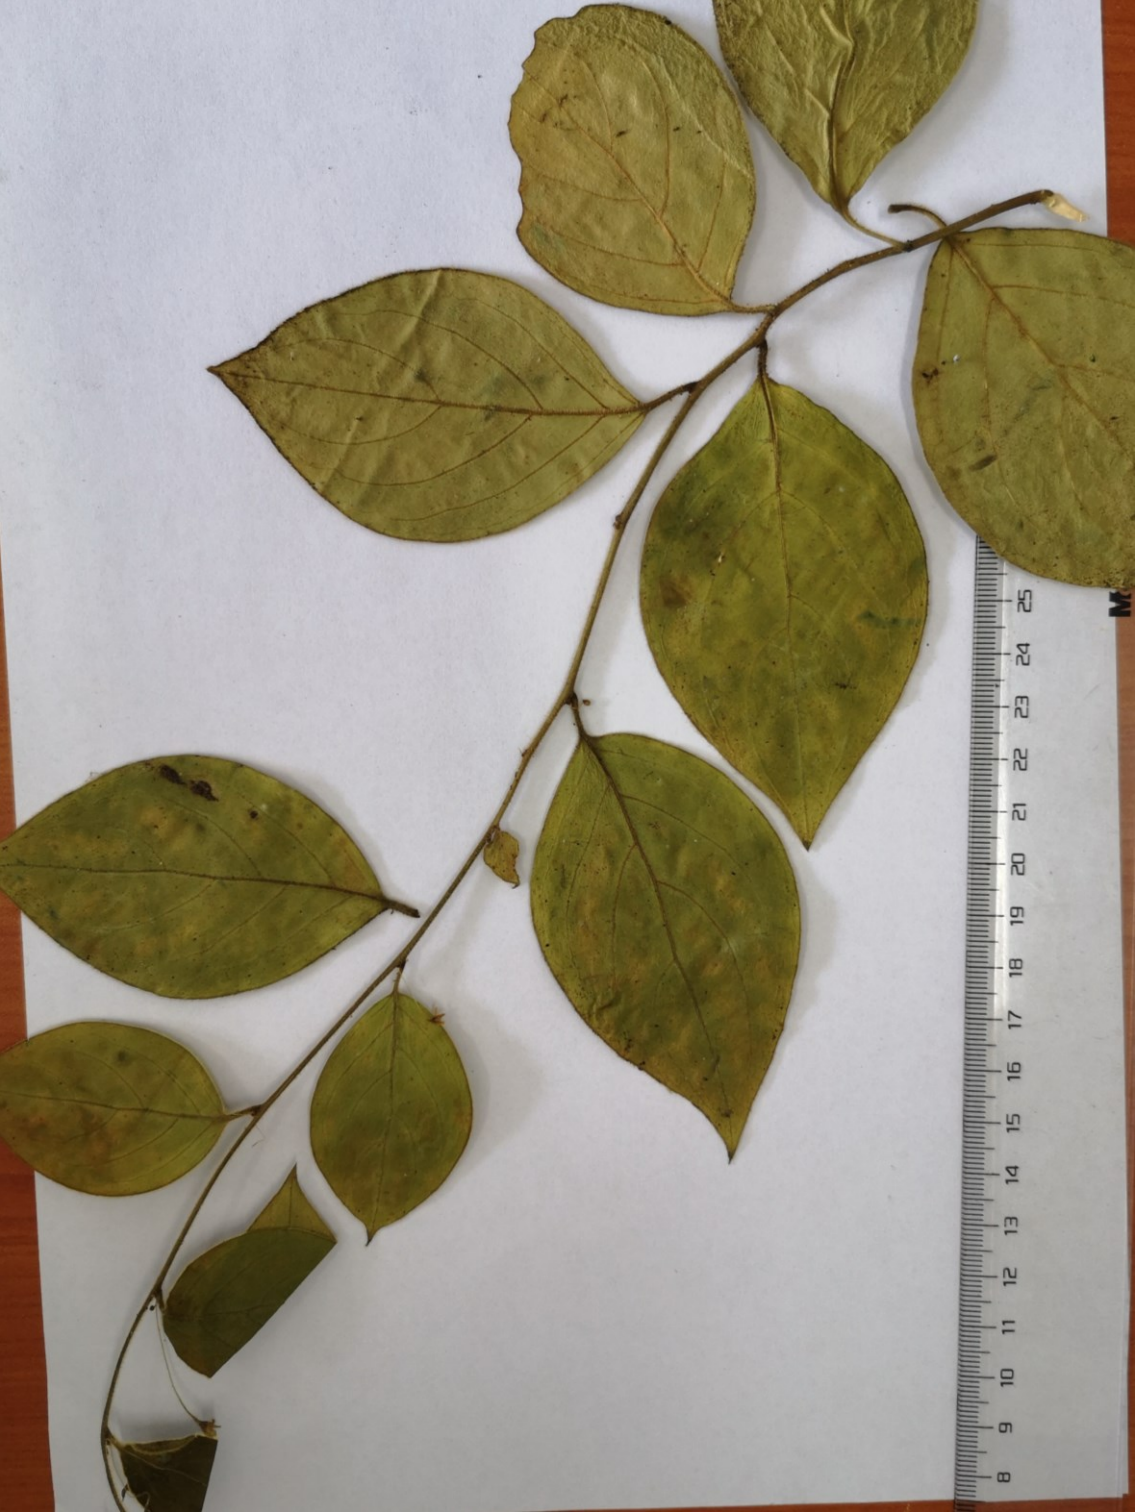

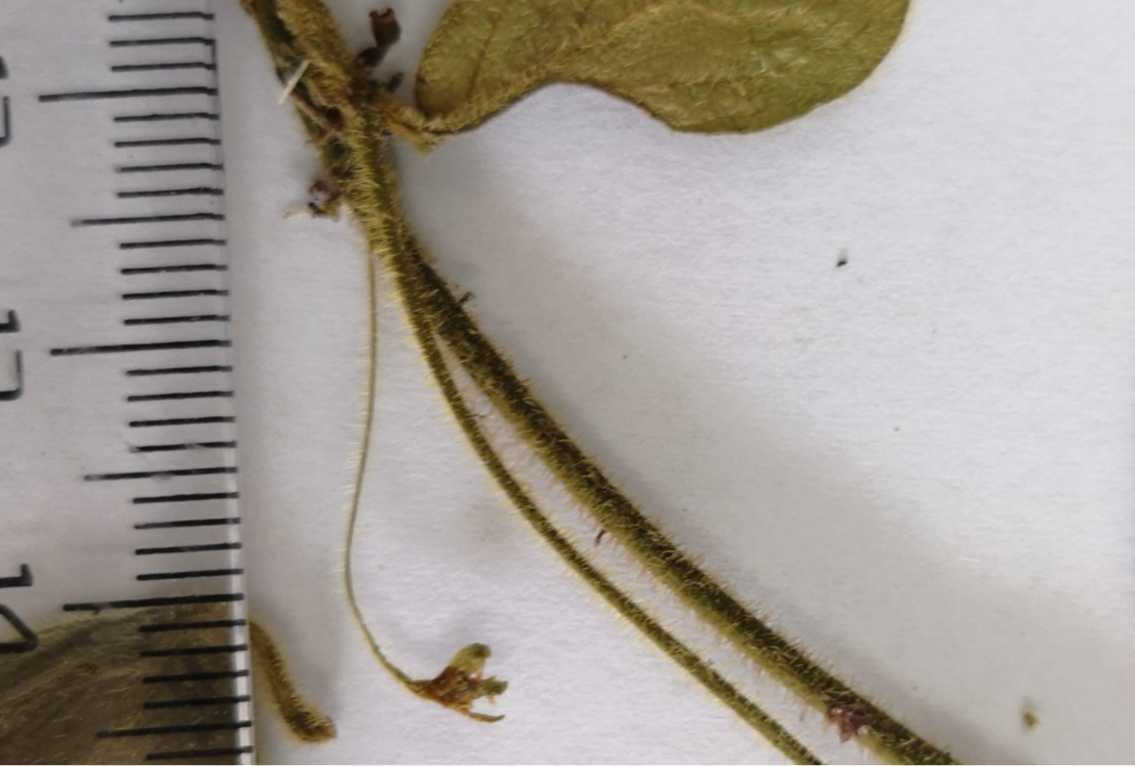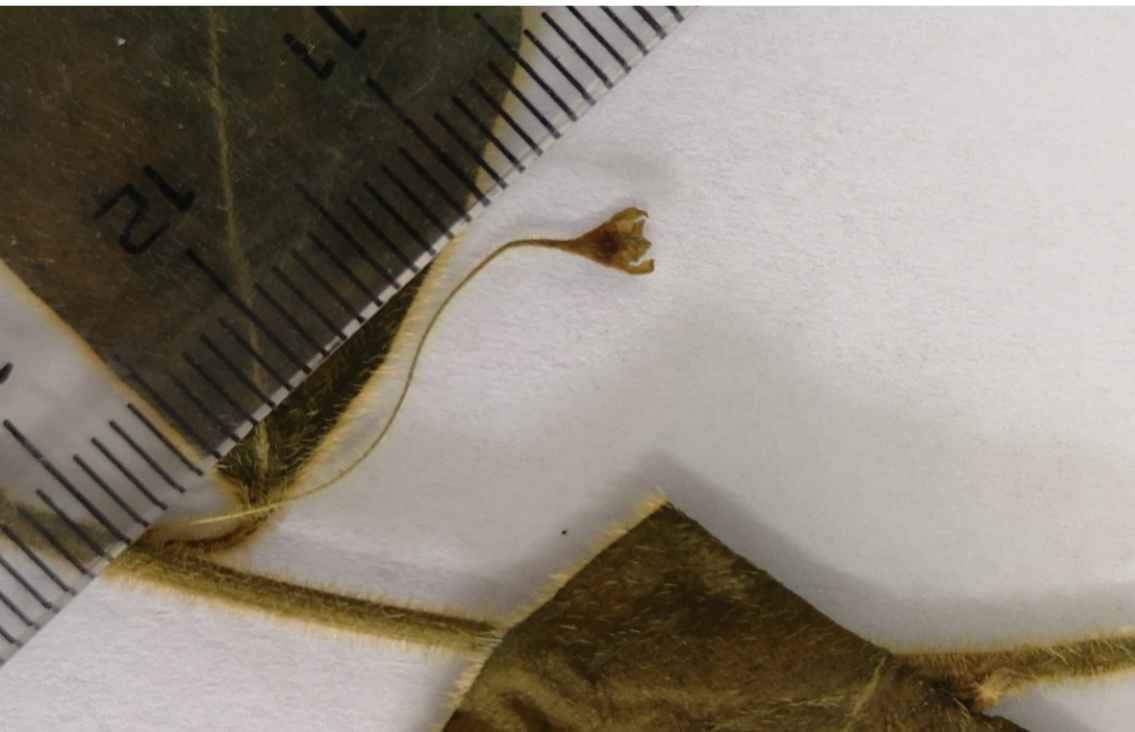



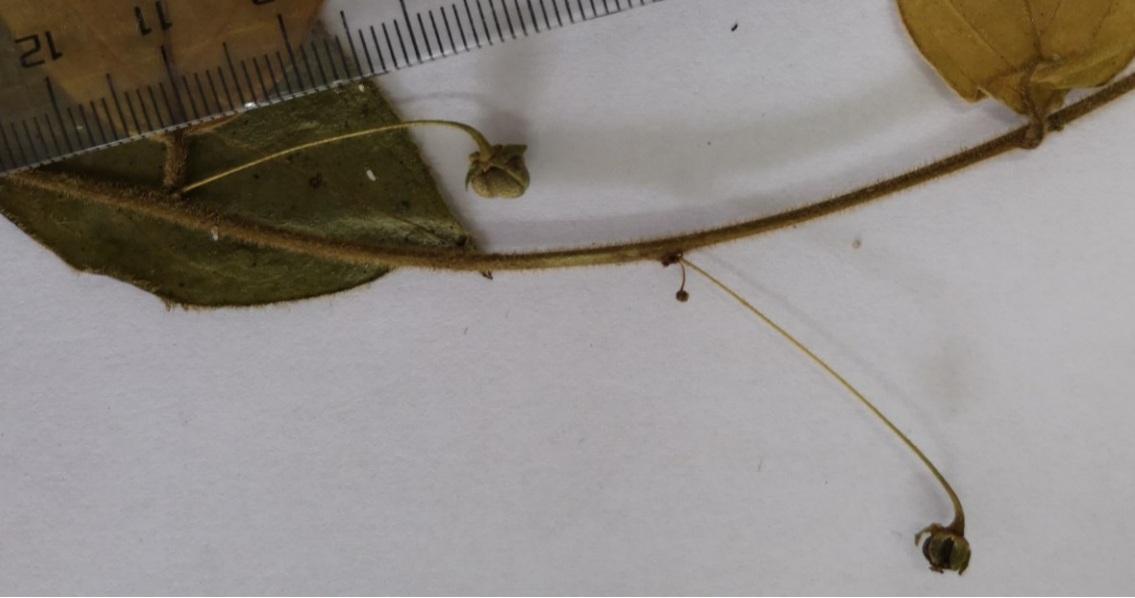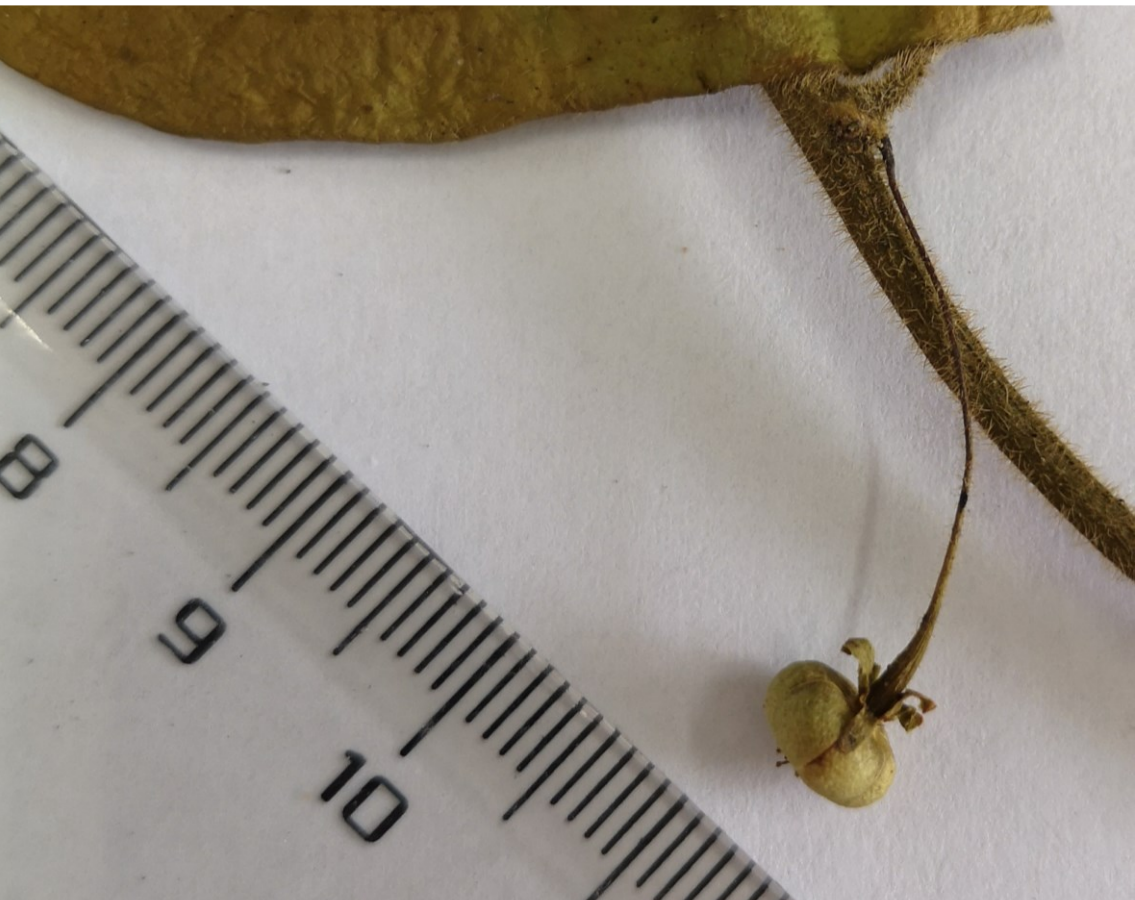

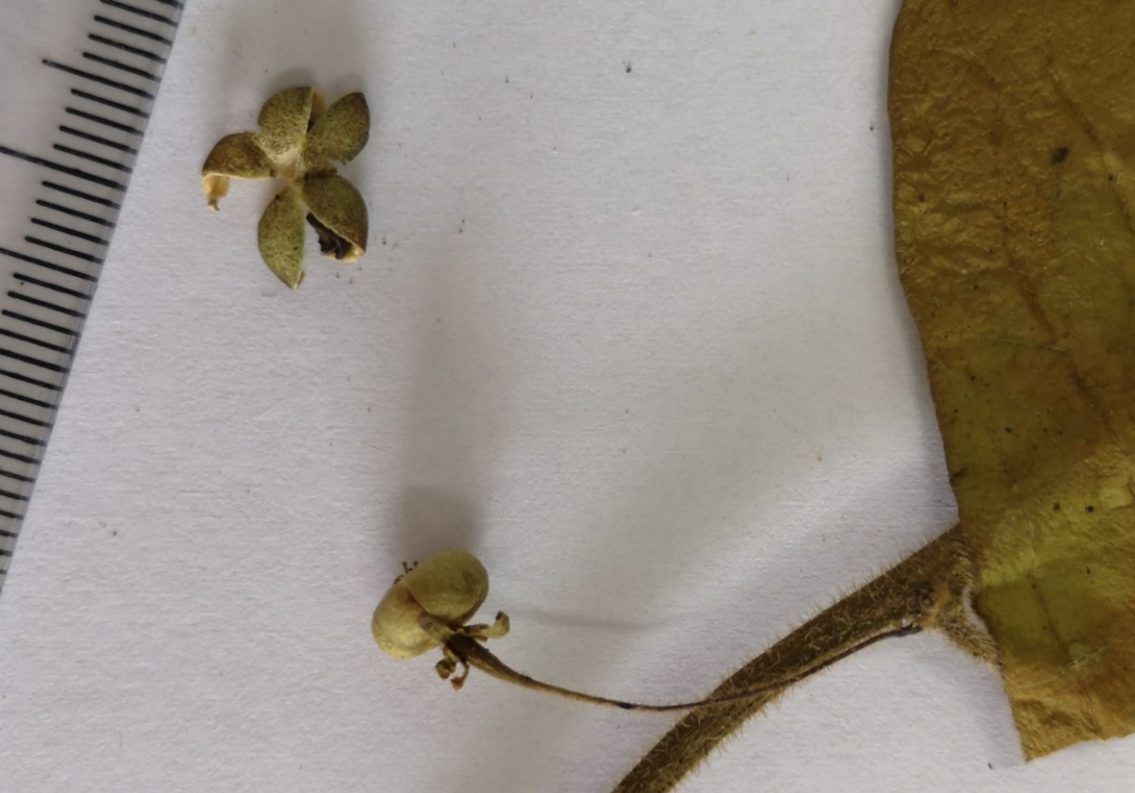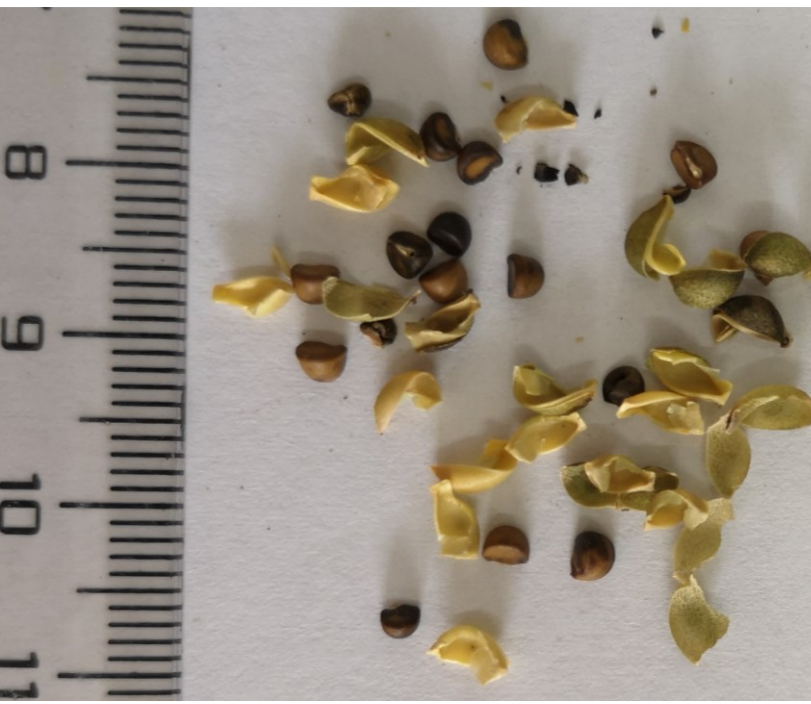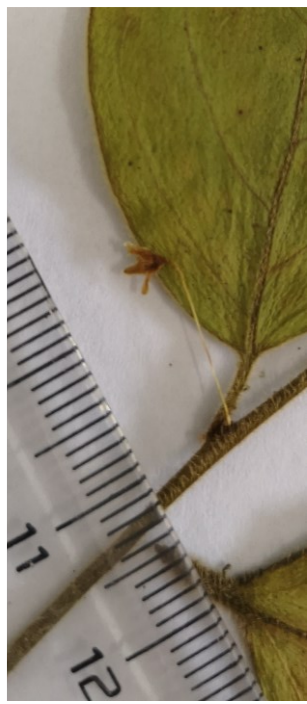

Supplement: Raw_Data_-_Plant_Measurements.pdf [file Raw_Data_-_Plant_Measurements.pdf]
